# Supplementary material for: The furin cleavage site in the SARS-CoV-2 spike protein is required for transmission in ferrets
Source: Springer Nature journal article supplement (doi:10.1038/s41564-021-00908-w), 2021-04-27

Figure 1c unedited western blot image

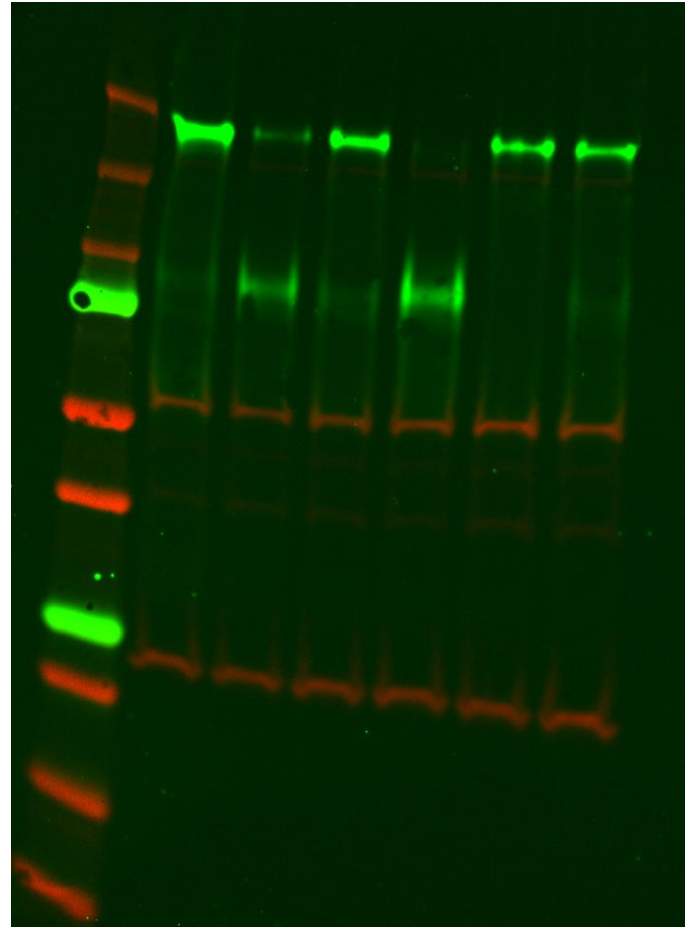

Green channel: anti-spike S2

Red channel: anti-p24

Figure 1d unedited western blot images

anti-spike S2

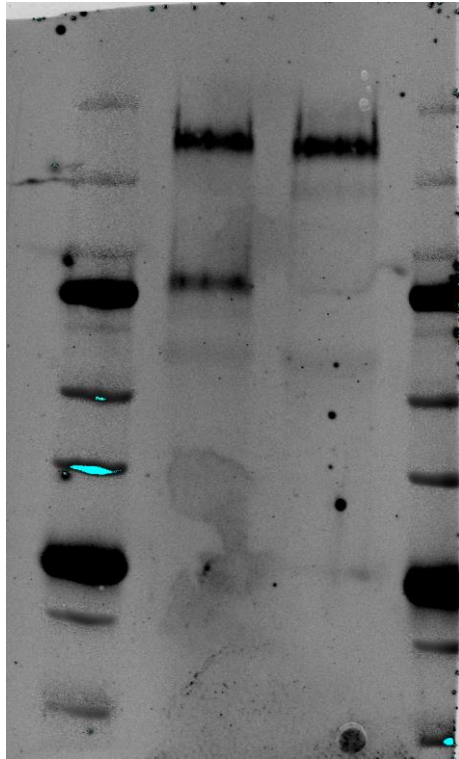

anti-Nucleocapsid

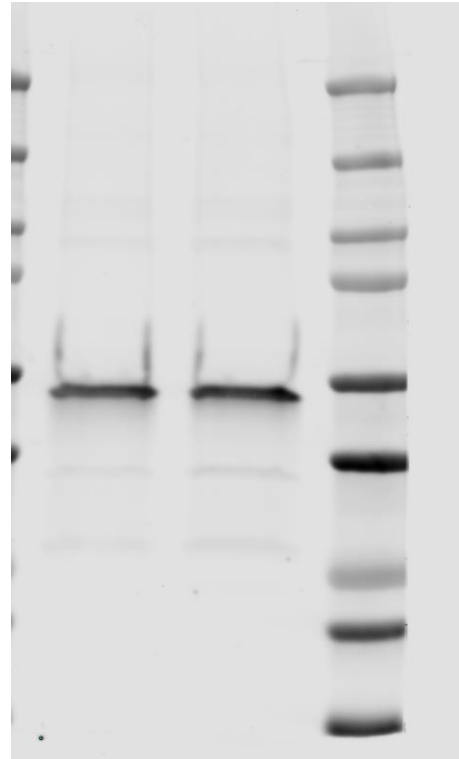

Supplement: 41564_2021_908_MOESM5_ESM.pdf [file 41564_2021_908_MOESM5_ESM.pdf]
