# Supplementary material for: The furin cleavage site in the SARS-CoV-2 spike protein is required for transmission in ferrets
Source: Springer Nature journal article supplement (doi:10.1038/s41564-021-00908-w), 2021-04-27

Extended data Figure 2b unedited western blot image

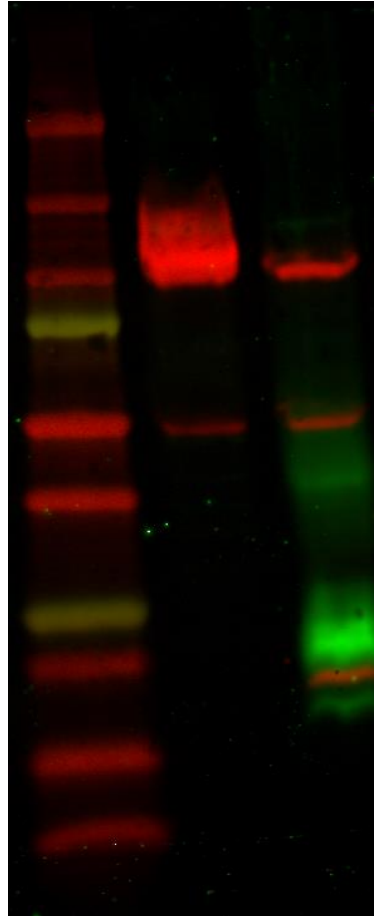

Green channel: anti-TMPRSS2

Red channel: anti-tubulin + anti-FLAG

Extended data Figure 2c unedited western blot image

anti-tubulin + anti-IFITM3

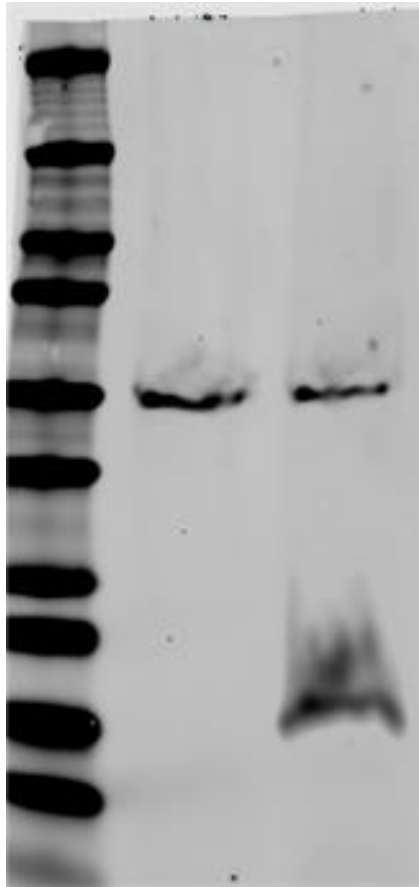

Supplement: 41564_2021_908_MOESM10_ESM.pdf [file 41564_2021_908_MOESM10_ESM.pdf]
